# Supplementary material for: Variability in ecological attributes of abundant species increases with taxonomic diversity: insights for assembly mechanisms of Neotropical bat communities
Source: Research Square preprint supplement (doi:10.21203/rs.3.rs-2618851/v1), 2023-03-13
Supplement: Supplementary file 1 [file ad05e55e0ce9e62f5ae692af.docx]

**Variability in ecological attributes of abundant species increases with taxonomic diversity: insights for assembly mechanisms of Neotropical bat communities**

**María A. Hurtado-Materon and Oscar E. Murillo-García**

**FIGURES**

**
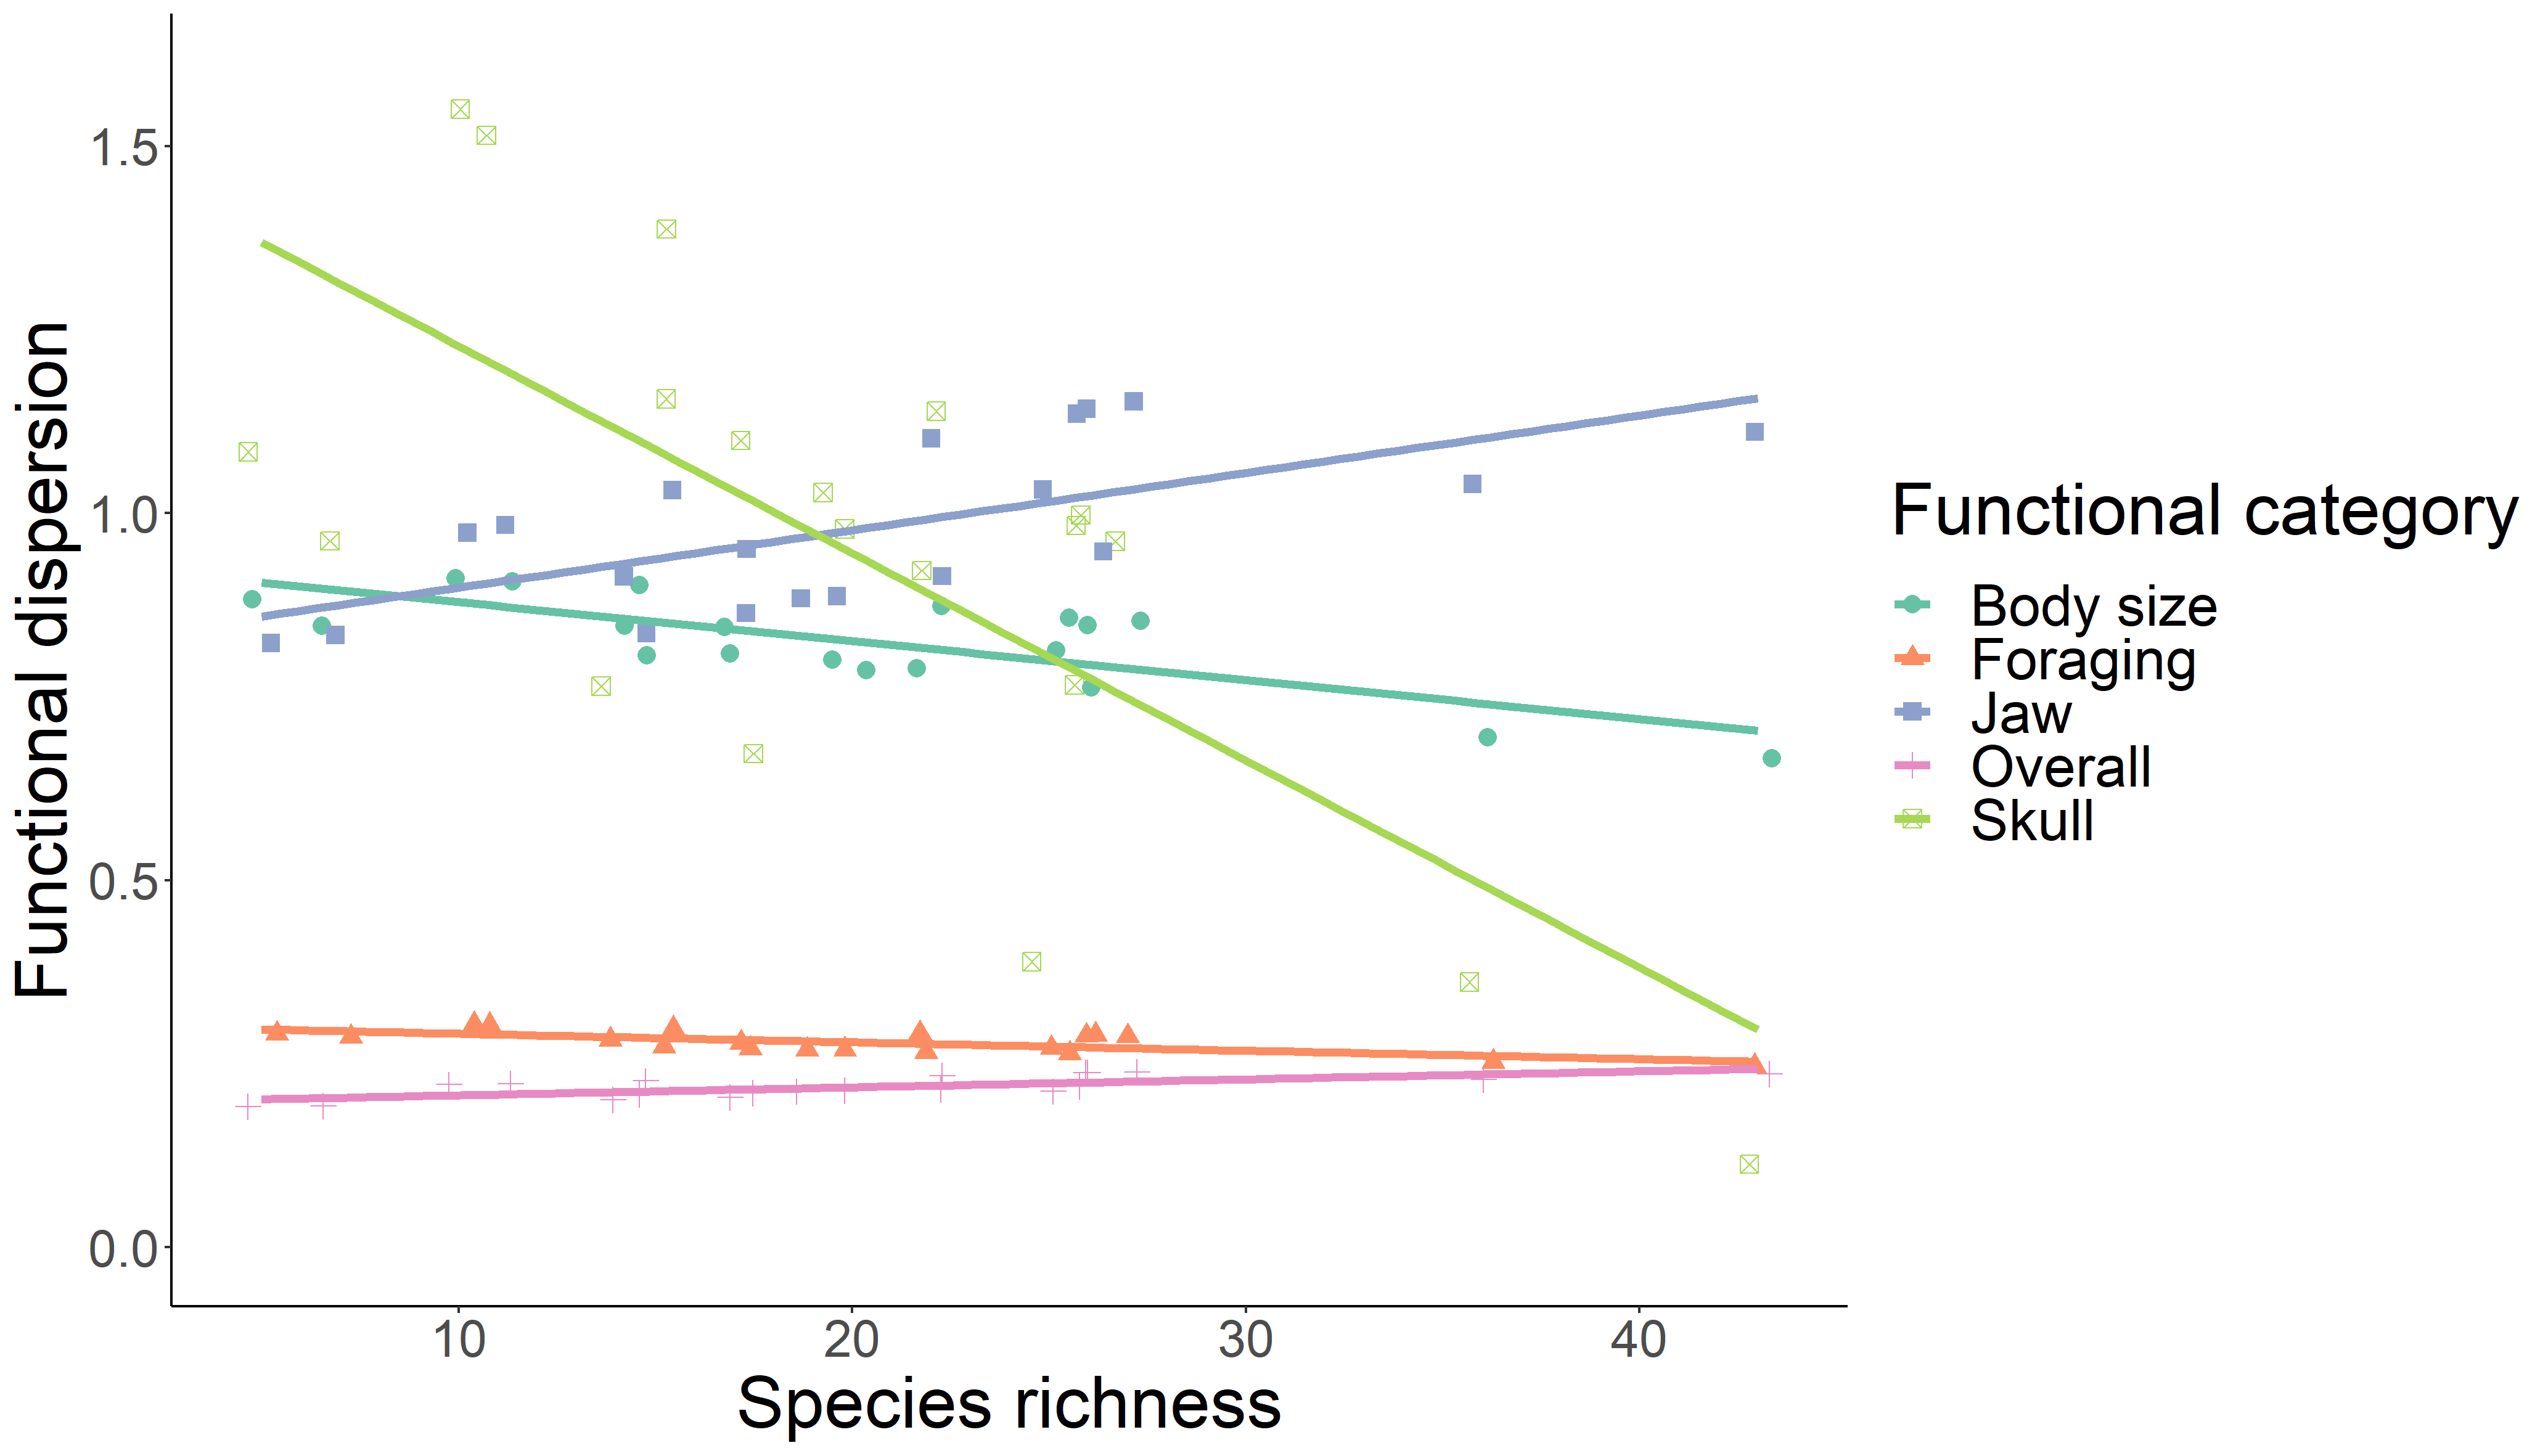
**

Figure S1. Variation in functional dispersion with species richness for Neotropical bat assemblages across Western and Central Mountain ranges of Colombian Andes.


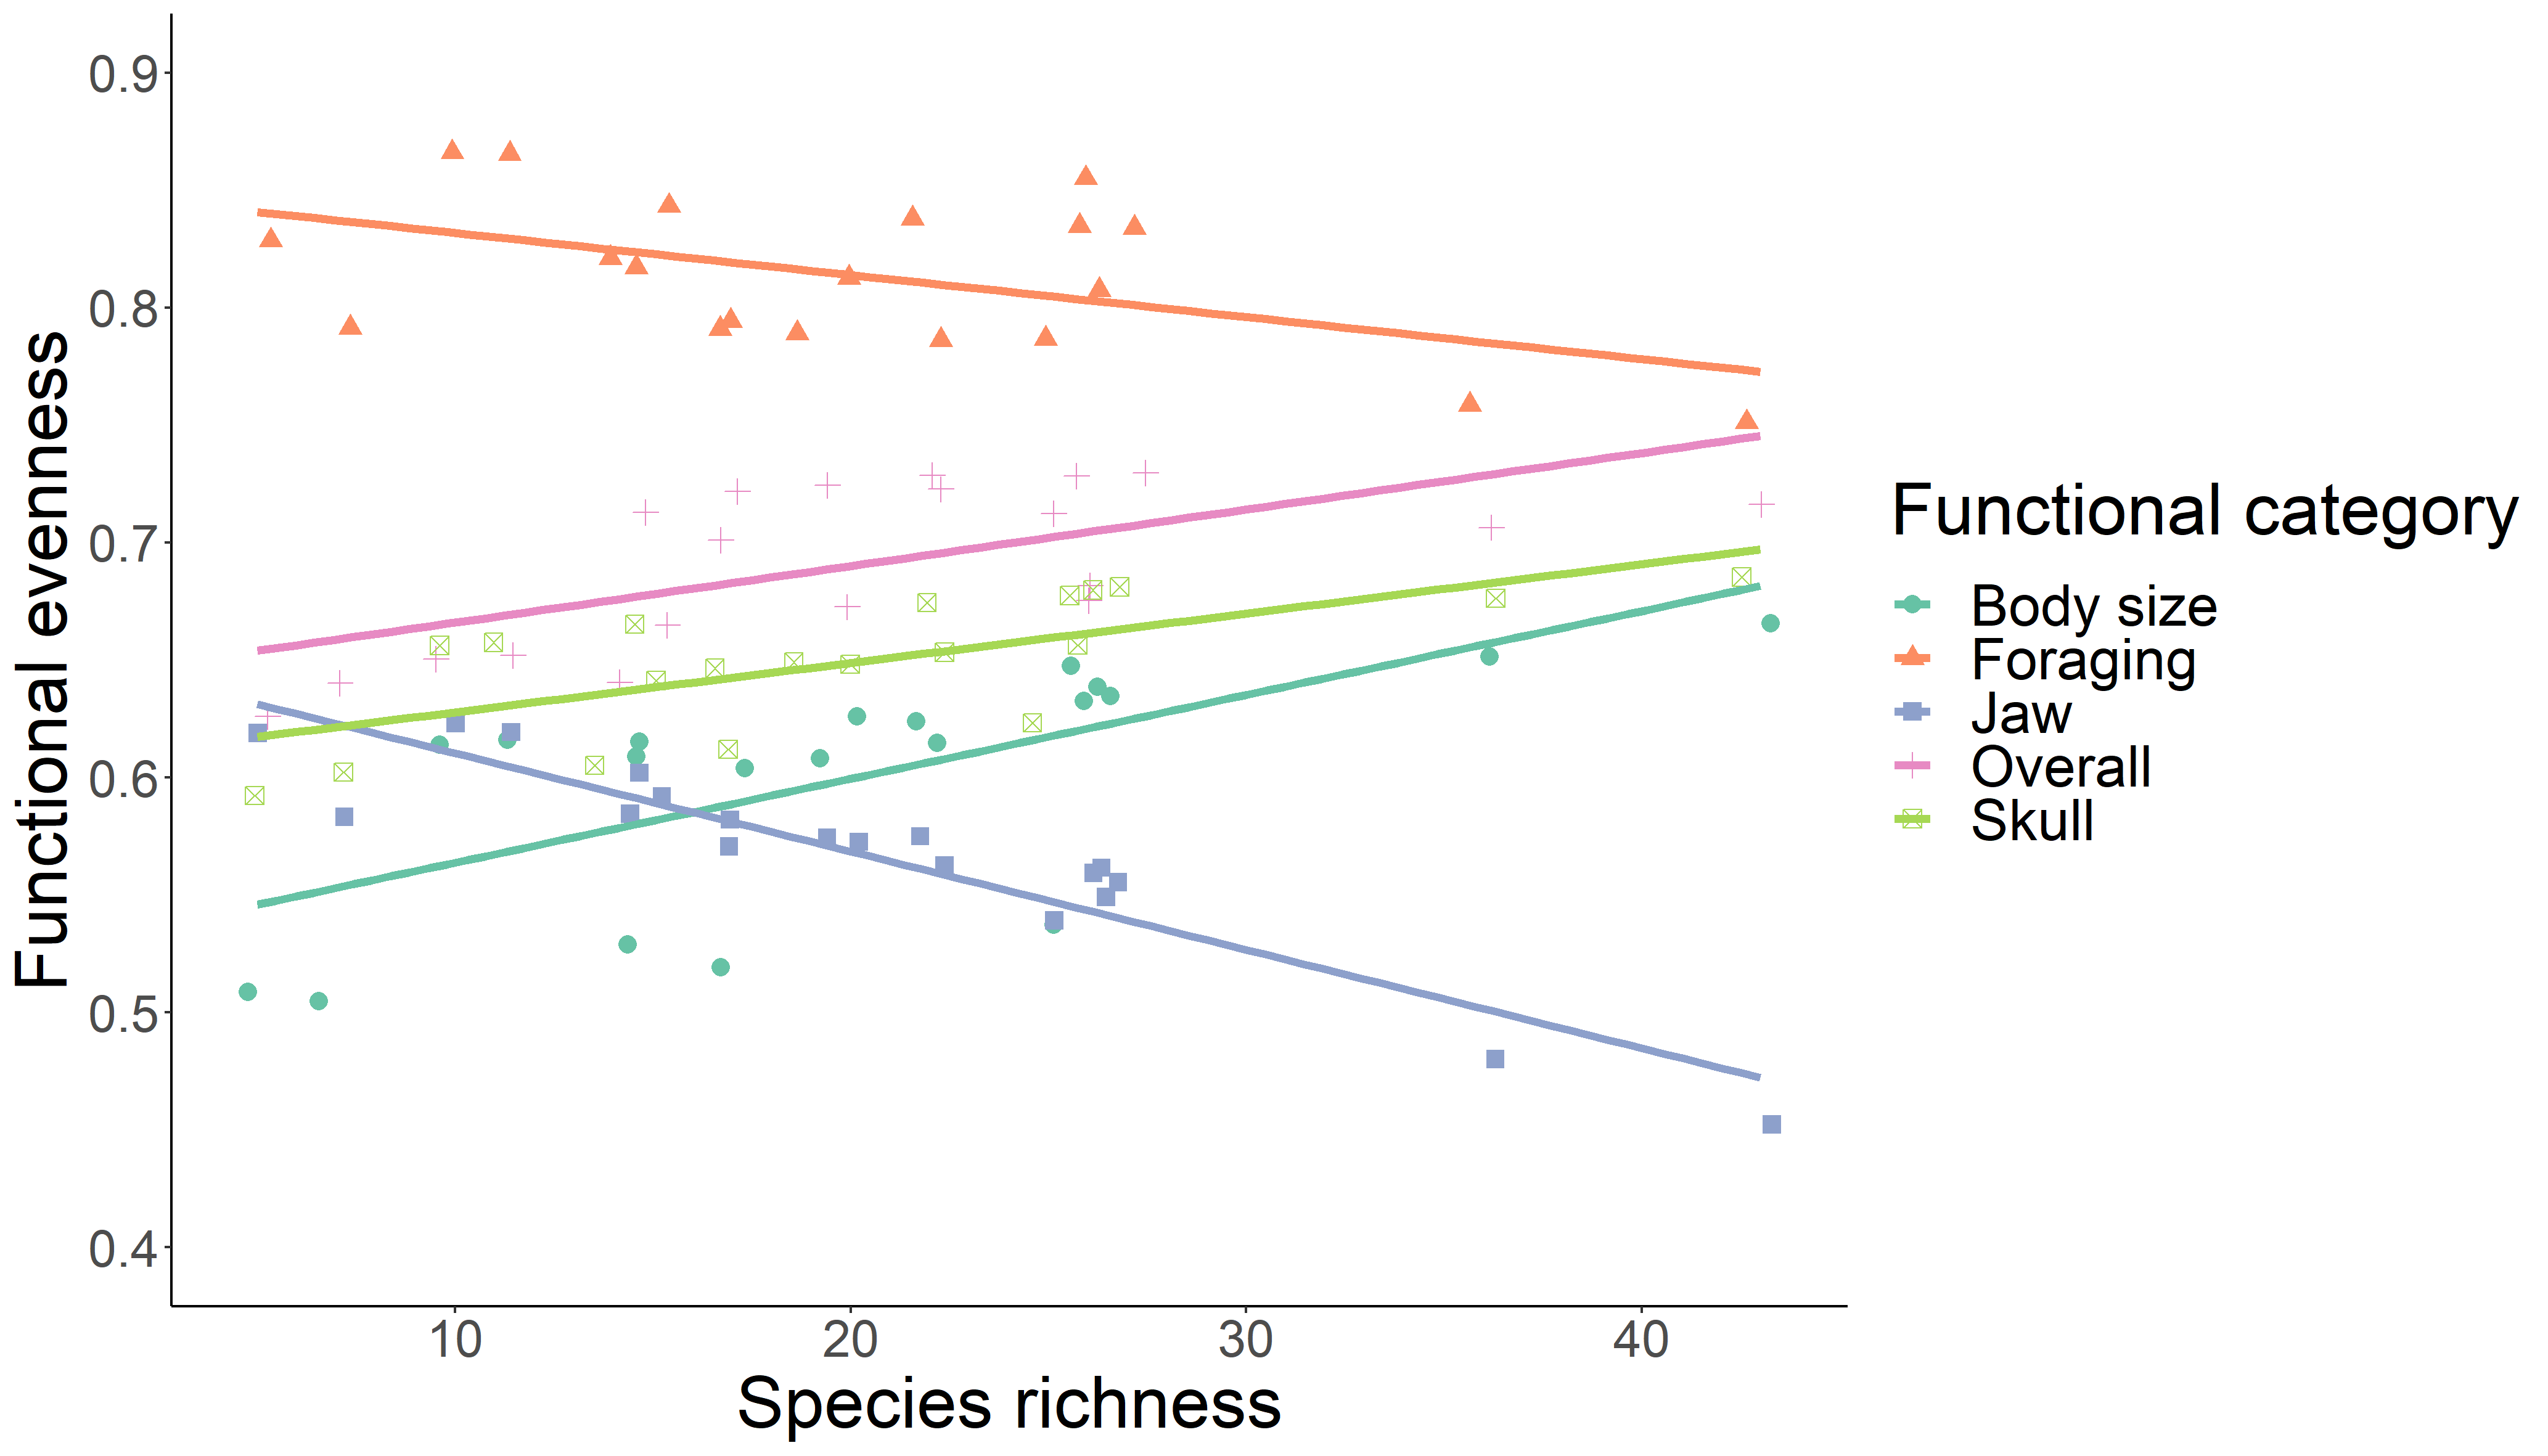


Figure S2. Variation in functional evenness with species richness for Neotropical bat assemblages across Western and Central Mountain ranges of Colombian Andes.


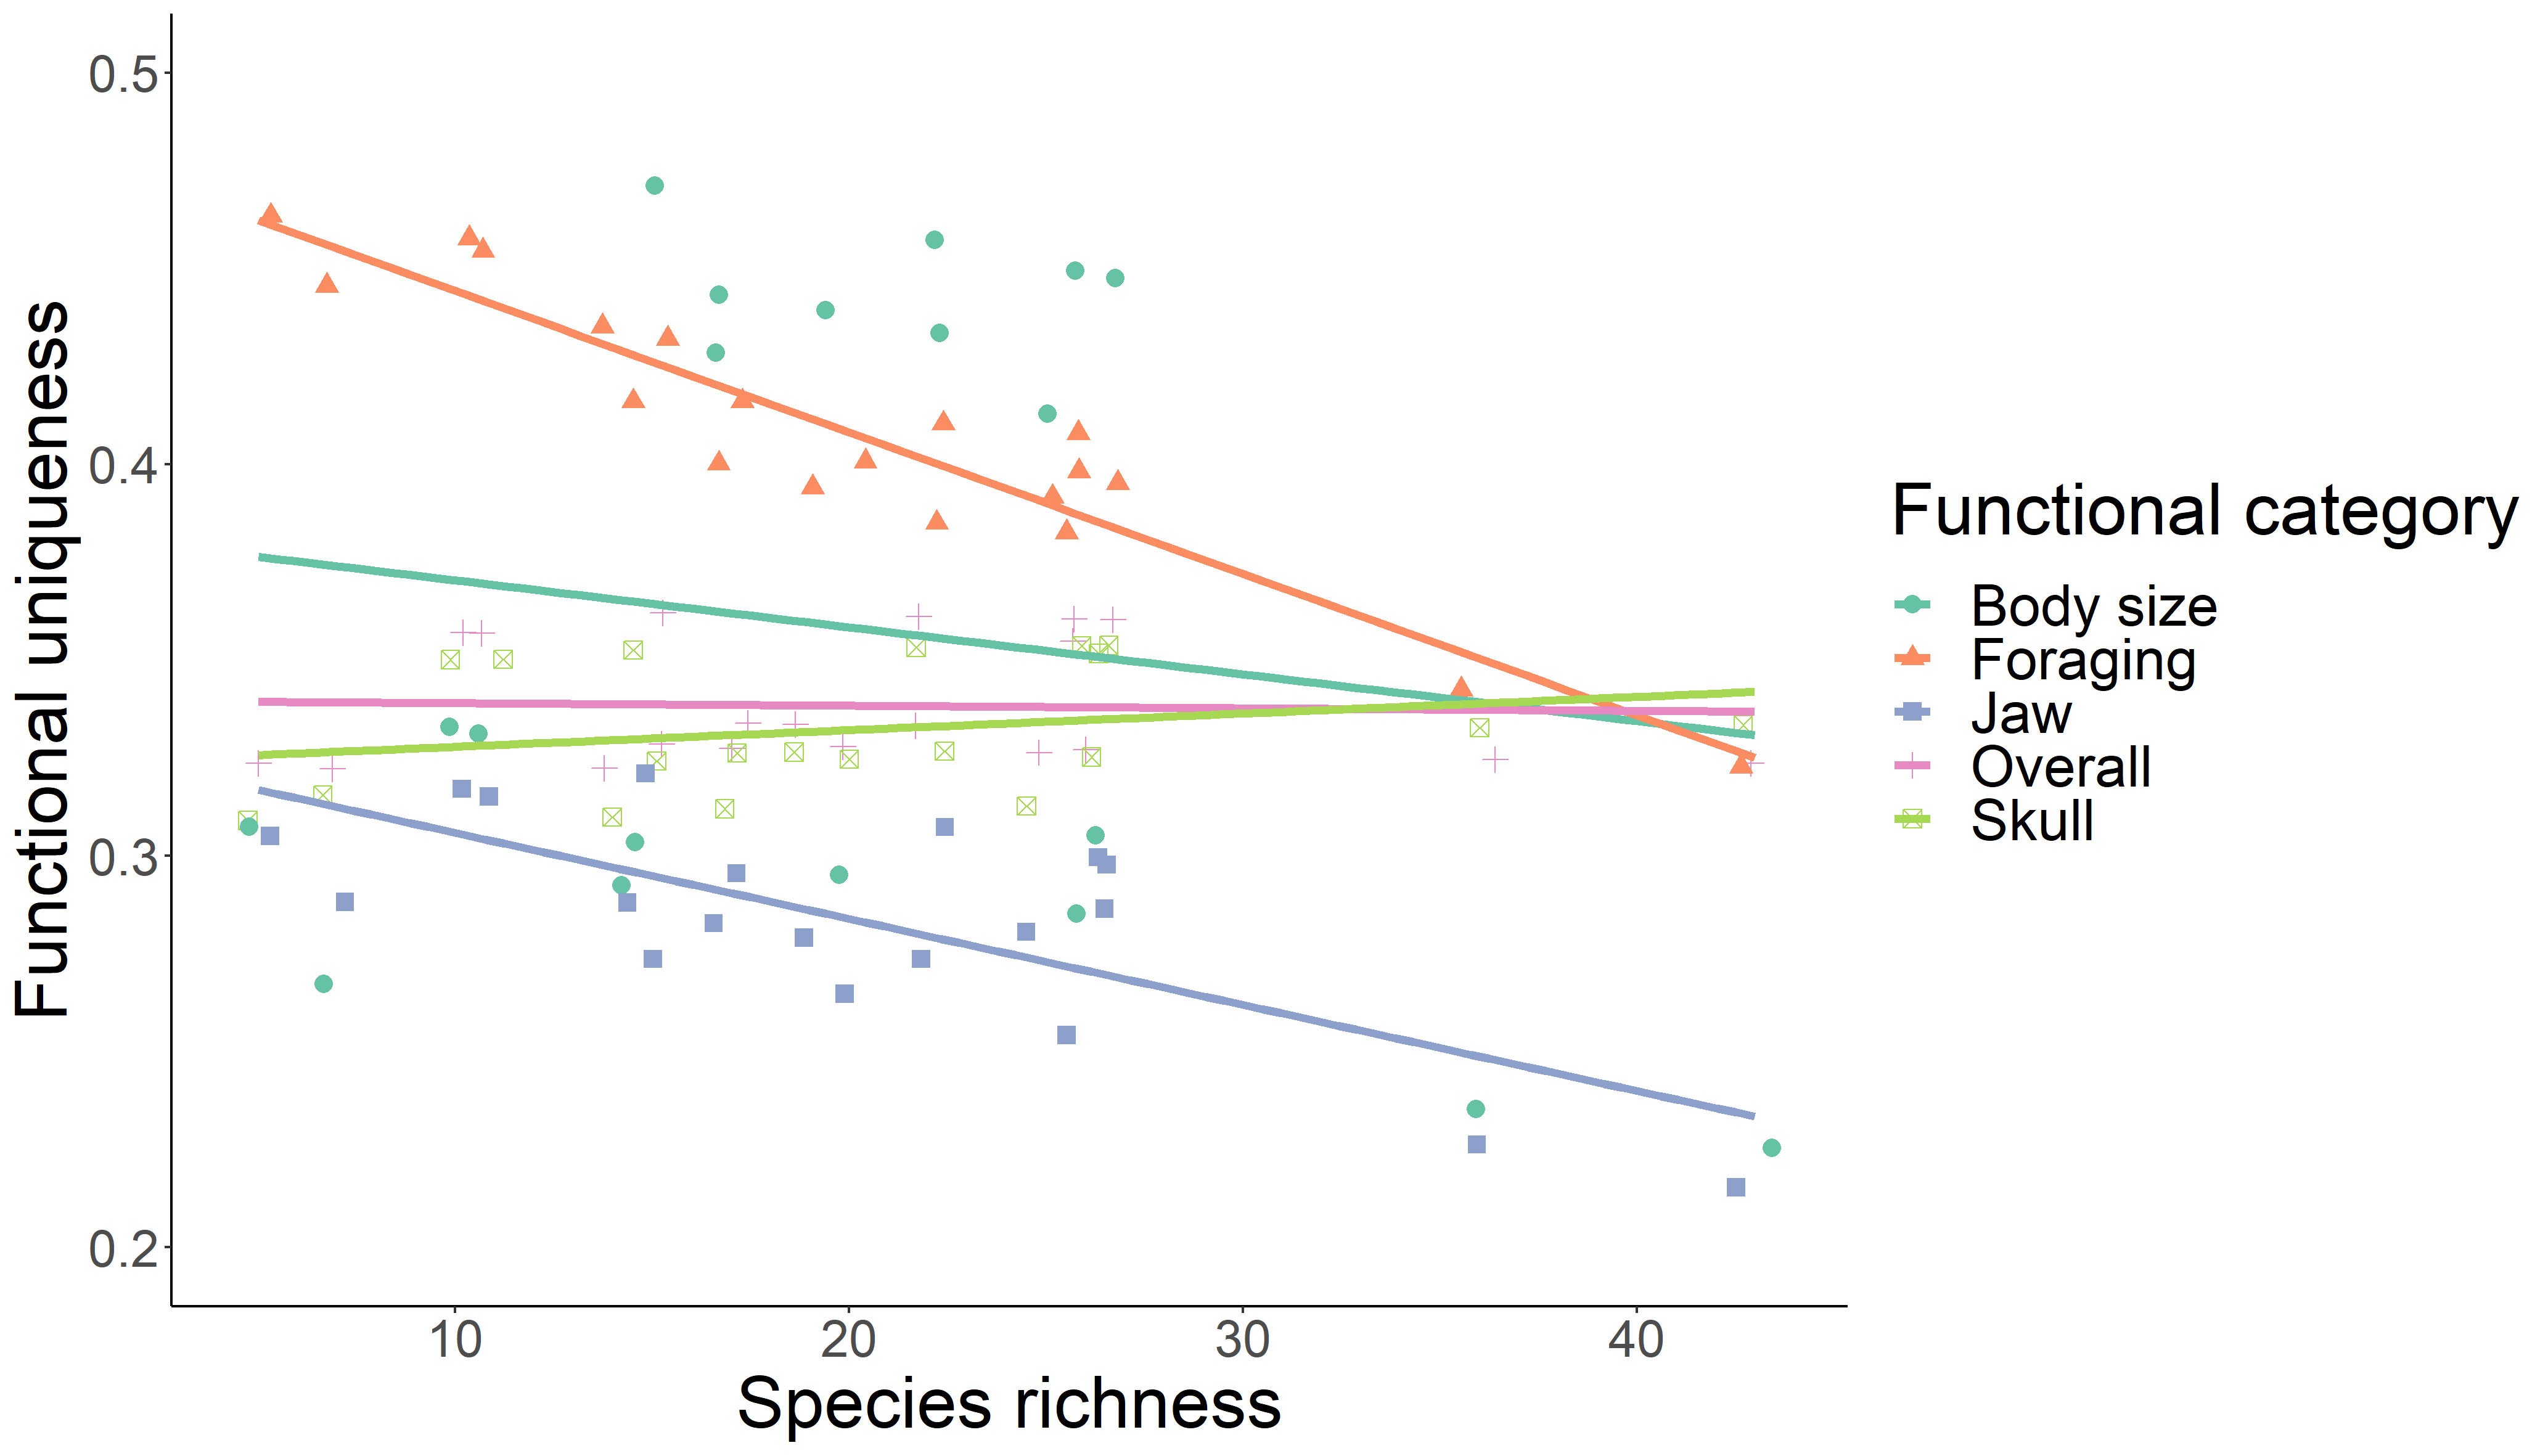


Figure S3. Variation in functional uniqueness with species richness for Neotropical bat assemblages across Western and Central Mountain ranges of Colombian Andes.

**TABLES**

Table S1. Result Generalized Linear Mixed Models for the relationship between species richness and both functional and phylogenetic diversity in Neotropical bat assemblages.

|  | **b** | **IC** | **Bayesian p-value** | **Lack of fit** | **b** | **IC** | **Bayesian p-value** | **Lack of fit** |
| --- | --- | --- | --- | --- | --- | --- | --- | --- |
|  | Functional divergence | | | | Functional dispersion | | | |
| Skull | 0.04 | [0.019, 0.063] | 0.561 | 1.167 | -0.035 | [-0.088, 0.018] | 0.455 | 1.054 |
| Jaw | 0.035 | [0.013, 0.057] | 0.552 | 1.175 | 0.01 | [-0.004, 0.025] | 0.439 | 1.042 |
| Size | 0.018 | [-0.007, 0.043] | 0.559 | 1.177 | -0.004 | [-0.038, 0.032] | 0.454 | 1.058 |
| Foraging | 1.08E-05 | [-0.025, 0.026] | 0.586 | 1.236 | -0.001 | [-0.006, 0.004] | 0.448 | 1.053 |
| Total | 0.035 | [0.015, 0.056] | 0.542 | 1.168 | 0.001 | [-0.001, 0.003] | 0.455 | 1.054 |
|  | Functional evenness | | | | Functional uniqueness | | | |
| Skull | 0.006 | [-0.015, 0.026] | 0.513 | 1.124 | 0.001 | [-0.021, 0.021] | 0.504 | 1.107 |
| Jaw | -0.016 | [-0.036, 0.003] | 0.51 | 1.124 | -0.009 | [-0.032, 0.012] | 0.573 | 1.19 |
| Size | 0.009 | [-0.017, 0.035] | 0.544 | 1.156 | -0.008 | [-0.062, 0.044] | 0.552 | 1.18 |
| Foraging | -0.005 | [-0.030, 0.023] | 0.523 | 1.13 | -0.013 | [-0.043, 0.019] | 0.564 | 1.191 |
| Total | 0.007 | [-0.014, 0.028] | 0.504 | 1.115 | -0.001 | [-0.018, 0.016] | 0.456 | 1.065 |
|  | Phylogenetic diversity | | | |  |  |  |  |
| MPD | 0.306 | [0.053, 0.575] | 0.458 | 1.053 |  |  |  |  |
| MNTD | -0.102 | [-0.355, 0.141] | 0.454 | 1.064 |  |  |  |  |

Table S2. Phylogenetic signal analysis results, using Pagel’s lambda 54 for functional traits evaluated in Neotropical bat assemblages.

| **Variable** | **Lambda** | **logL** | **logL0** | **p-value** |
| --- | --- | --- | --- | --- |
| Length of forearm | 1.007283326 | -233.4328652 | -252.1063089 | 9.89E-10 |
| Mass | 1.012526458 | -267.5122578 | -274.2179726 | 0.000250096 |
| Total length | 1.004426824 | -263.4624565 | -275.2757988 | 1.17E-06 |
| Wing shape | 0.918217529 | 67.51144412 | 51.8516141 | 2.19E-08 |
| Relative length of the pinna | 0.84567742 | 85.64376594 | 76.05942661 | 1.20E-05 |
| Total skull length | 1.009112078 | -196.5644028 | -204.8975434 | 4.46E-05 |
| Breadth of braincase | 1.00196301 | -112.1240716 | -125.4480205 | 2.44E-07 |
| Length of maxillary toothrow | 1.015351782 | -124.1632925 | -140.6234117 | 9.60E-09 |
| Breadth across upper molar | 1.014563149 | -124.667545 | -156.7473433 | 1.15E-15 |
| M2 area | 1.020310458 | -136.9786198 | -162.0337683 | 1.45E-12 |
| Meddle skull width | 0.698406934 | -128.2739207 | -133.0679473 | 0.001958475 |
| Total dentary length | 0.990595895 | -162.4050156 | -169.5402938 | 0.000158322 |
| Condyle-canine length | 0.985938147 | -160.9227831 | -167.8735296 | 0.000192645 |
| Coronoid process height | 1.002440495 | -111.750743 | -127.389719 | 2.24E-08 |

Table S3. Localities across the Western and Central ranges of the Colombian Andes used for this study.

| State | Municipality | Locality | Mountain range | Altitude, MASL | | Ecoregion |
| --- | --- | --- | --- | --- | --- | --- |
| Mín | Máx |
| Valle del Cauca | Buenaventura | Bahía Malaga | Western | 0 | 0 | Pacific-South American Mangroves |
| Chocó | Bahía Solano | Ensenada de Utría | Western | 5 | 10 | Chocó-Darien wet forests |
| Chocó | Bajo Baudó | Piliza | Western | 0 | 100 | Chocó-Darien wet forests |
| Valle del Cauca | Buenaventura | Bajo Calima | Western | 40 | 400 | Chocó-Darien wet forests |
| Caldas | La Dorada | Guarinocito, Hacienda La Española | Central | 235 | 313 | Valle del Magdalena montane forest |
| Risaralda | Pueblo rico | Santa Cecilia, Volga, Alto Amurrapá | Western | 413 | 470 | Northeast of the Andes montane forest |
| Valle del Cauca | Buenaventura | Alto Anchicaya | Western | 230 | 660 | Chocó-Darien wet forests |
| Chocó | San José del Palmar |  | Western | 350 | 900 | Chocó-Darien wet forests |
| Chocó | San José del Palmar | Alto del oso | Western | 1000 | 1000 | Northeast of the Andes montane forest |
| Valle del Cauca | Buga | El Vínculo | Central | 975 | 1100 | Valle del Cauca dry forests |
| Risaralda | Belen de Umbría |  | Western | 1525 | 1747 | Valle del Cauca montane forest |
| Cauca | Cajibio | El Cofre, Finca La Herencia | Macizo | 1700 | 1700 | Valle del Cauca montane forest |
| Valle del Cauca | El Cairo | Quebrada Charco azul | Western | 1600 | 1800 | Northeast of the Andes montane forest |
| Valle-Chocó |  | Alto de Galápagos | Western | 1800 | 2000 | Northeast of the Andes montane forest |
| Valle del Cauca | La Cumbre | Bitaco, Chicoral | Western | 1650 | 2176 | Valle del Cauca montane forest |
| Risaralda | Dosquebradas | Parque Regional Natural Ucumarí, estación Piscicola "El cedral" | Central | 2130 | 2196 | Valle del Cauca montane forest |
| Valle del Cauca | El Cairo | Estación biológica cerro El Ingles | Western | 2000 | 2400 | Northeast of the Andes montane forest |
| Quindío | Salento | Boquía, Reserva Natural La Patasola, finca La Betulia | Central | 2200 | 2600 | Valle del Cauca montane forest |
| Quindío | Salento | Finca Bengala, otros | Central | 2740 | 3250 | Valle del Cauca montane forest |
| Risaralda | Pereira | Laguna de Otún, 6 km N 9 km O (El porvernir) | Central | 3150 | 3560 | Valle del Cauca montane forest |
